# Supplementary material
Source: HighWire-hosted journal article supplement (https://fn.bmj.com/content/archdischild-2018-316463)
Supplement: inline-supplementary-material-2 [file inline-supplementary-material-2.docx]

**Ethnic and socio-economic variation in cause-specific preterm infant mortality by gestational age at birth: national cohort study**

**Supplementary Table**

**Table S1. Adjusted incidence rate ratio for infant mortality in preterm babies, by household occupational socio-economic status (NS-SEC) relative to higher managerial, administrative and professional occupations, with 95% confidence interval.** 10% sample of live singleton births at 24-36 weeks, England and Wales 2006-2012.

| **Cause of death** | **Congenital** | **Immaturity-** | **Other causes** | **All causes** | **N** |
| --- | --- | --- | --- | --- | --- |
| **Gest. at birth** | **anomalies** | **related** |  |  |  |
| **24-27 weeks** |  |  |  |  |  |
| Higher | 1.00 | 1.00 | 1.00 | 1.00 | 450 |
| Intermediate | 1.10 (0.37-3.26) | 0.91 (0.68-1.23) | 1.34 (0.59-3.05) | 0.97 (0.75-1.25) | 227 |
| Routine/manual | 1.22 (0.47-3.15) | 0.98 (0.76-1.27) | 1.26 (0.59-2.70) | 1.03 (0.83-1.28) | 337 |
| Other | 0.50 (0.10-2.45) | 0.93 (0.66-1.30) | 1.17 (0.44-3.10) | 0.91 (0.68-1.22) | 169 |
| Χ2 for variation | 1.3, p=0.7 | 0.4, p=0.9 | 0.6, p=0.9 | 0.6, p=0.9 |  |
| **28-31 weeks** |  |  |  |  |  |
| Higher | 1.00 | 1.00 | 1.00 | 1.00 | 1056 |
| Intermediate | 1.79 (0.71-4.52) | 1.24 (0.71-2.18) | 1.08 (0.44-2.62) | 1.30 (0.86-1.96) | 492 |
| Routine/manual | 1.48 (0.63-3.48) | 0.89 (0.52-1.51) | 1.19 (0.55-2.56) | 1.07 (0.73-1.57) | 837 |
| Other | 0.33 (0.04-2.54) | 1.31 (0.69-2.49) | 0.79 (0.22-2.80) | 1.01 (0.60-1.72) | 311 |
| Χ2 for variation | 3.8, p=0.3 | 2.0, p=0.6 | 0.5, p=0.9 | 1.7, p=0.6 |  |
| **32-36 weeks** |  |  |  |  |  |
| Higher | 1.00 | 1.00 | 1.00 | 1.00 | 8964 |
| Intermediate | 0.90 (0.54-1.50) | 5.04 (1.75-14.50) | 0.99 (0.50-1.96) | 1.21 (0.84-1.73) | 4342 |
| Routine/manual | 0.82 (0.51-1.32) | 2.24 (0.73-6.88) | 1.68 (0.98-2.90) | 1.19 (0.85-1.66) | 6156 |
| Other | 0.81 (0.40-1.64) | 1.49 (0.29-7.76) | 2.34 (1.23-4.45) | 1.36 (0.87-2.12) | 2283 |
| Χ2 for variation | 0.8, p=0.9 | 10.5, p=0.01 | 9.0, p=0.03 | 2.3, p=0.5 |  |

Stratified by gestational age at birth and cause of death. Adjusted for ethnicity (9 groups), birth year and gestation week. All models have acceptable goodness-of-fit (Pearson p>0.5). ‘Other’ socio-economic status includes unstated/unspecific, students, long-term unemployed, and never worked. P-value from Wald test for socio-economic variation. Gest. at birth, gestational age at birth. N, number of births.
